# Population history of the Northern corn leaf blight fungal pathogen *Setosphaeria turcica* in Europe

Mireia Vidal-Villarejo<sup>a,1</sup>, Fabian Freund<sup>a,1</sup>, Hendrik Hanekamp<sup>b</sup>, Andreas von Tiedemann<sup>b</sup>, and Karl Schmid<sup>a</sup>

<sup>a</sup>University of Hohenheim, Stuttgart, Germany; <sup>b</sup>University of Göttingen, Göttingen, Germany

<sup>1</sup>M.V.V. and F.F. contributed equally to this work.

<sup>2</sup>To whom correspondence should be addressed. E-mail: karl.schmid@uni-hohenheim.de

FF, AvT and KS designed the study. AvT contributed materials. HH phenotyped the races. MV-V, FF, and KS analysed the data. MV-V, FF and KS wrote the manuscript.

We declare no conflict of interest.

## Abstract

*Setosphaeria turcica* is a major fungal pathogen of maize and causes the foliar disease Northern corn leaf blight (NCLB). It originates from tropical regions and expanded into Central Europe since the 1980s, simultaneously with a rapid increase of maize cultivation area in this region. To investigate evolutionary processes influencing the rapid expansion of *S. turcica* we sequenced 121 isolates from Central Europe, Western Europe and Kenya. Population genetic inference revealed five genetically distinct clusters that differ by their geographic distribution and emergence dates. One genetically diverse cluster is restricted to Kenya, and the four European clusters consist of three distinct clonal lineages with low genetic diversity and one genetically diverse cluster with several clonal sublineages. A comparison of two different coalescent models for genetic diversity in the most frequent and geographically widespread clonal lineage in Europe supported a model of neutral, strongly exponential population growth over models accounting for different types of selection. In contrast to Kenyan isolates, European isolates did not show sexual recombination despite the presence of both mating types *MAT1-1* and *MAT1-2* in Europe. Within clonal lineages phenotypic variation in virulence to different monogenic resistances likely originated from repeated *de novo* mutations in virulence genes of *S. turcica*. *k*-mer based association mapping between genetic clusters did not identify genomic regions associated with pathogen races but few genomic regions that are significantly differentiated between two clonal lineages and contain putative effector genes. Our results suggest that the rapid colonization of Europe by different clonal lineages of *S. turcica* was not driven by selection of virulent races but reflects a neutral demographic process of fast pathogen population growth fostered by a rapid expansion of the maize cultivation area in this region.

**Keywords:** Demographic history | Population structure | Coalescent theory | *Setosphaeria turcica* | Maize

## Introduction

Modern agricultural practice is characterized by reduced crop rotation, large field sizes of monocultures, high chemical inputs and cultivation of resistant varieties. These factors influence both short-term epidemics and a long-term evolution of resistant pathogen strains that may rapidly expand over large geographic areas (1). In addition, climate warming favors the spread and adaptation of pathogen species to new environments and geographic regions (2). These factors contribute to rapid crop-pathogen co-evolution, whose understanding is essential to improve

25 management practices and plant breeding to maintain food security in a rapidly changing world (3). Global pathogen  
26 monitoring systems for plant pathogens identify the origin and expansion of new pathogen strains (4) to support  
27 resistance breeding and adaptation of crop management practices. Disease monitoring is greatly facilitated by  
28 genome sequencing to characterize pathogen diversity (5) although a sequence-based prediction of virulence types  
29 remains challenging due to a rapid evolution of pathogen genomes (6–10). Sequencing data were used to track the  
30 epidemiology and demographic history of pathogens (e.g., 11–13) and to reconstruct introductions (14). However,  
31 the relative importance of demographic effects versus selection-driven adaptation to cultivation conditions or plant  
32 resistance genes is still little understood. Therefore, a characterization of demography and selection to evaluate  
33 the evolutionary potential of pathogen species (15) will contribute to developing evolution-informed, durable  
34 crop management strategies to avoid rapid breaking of host resistance genes and reduce chemical inputs in plant  
35 protection (16).

36 The hemibiotrophic fungal pathogen *Setosphaeria turcica* (Luttrell) Leonard and Suggs (teleomorph *Exserohilum*  
37 *turcicum*, formerly known as *Helminthosporium turcicum*) is the most important leaf pathogen of maize. It causes  
38 Northern corn leaf blight (NCLB), whose symptoms are long, elliptical stripes of necrotic tissues (lesions) on maize  
39 leaves, which limits the photosynthetic productivity and causes yield reduction (17). NCLB is a worldwide disease  
40 with a high incidence in the tropics, where it is a major cause of yield loss in maize. The most important methods for  
41 controlling the disease are breeding resistant varieties (18) and adapted management practices including fungicide  
42 applications. Additional management practices, such as biological control, are being studied (19, 20). *S. turcica* shows  
43 asexual and sexual reproduction, which requires mating of two strains with different *MAT1-1* and *MAT1-2* alleles at  
44 the *MAT1* mating type locus. Worldwide surveys of genetic diversity of *S. turcica* showed that sexual reproduction  
45 is restricted to regions with a warm climate (17). Genetic diversity was higher in populations from Mexico in  
46 comparison to Kenya, China and Europe suggesting that *S. turcica* originated in Mexico and recently arrived in  
47 Europe (21). NCLB was first reported in Italy in 1876, followed by South-Western France around 1900. Until the 1980s,  
48 NCLB was mainly restricted to the warmer regions of Southern Europe and the Balkans, but between 1988 and 1992  
49 the disease crossed the Alps, and in 1995 it was reported in the Upper Rhine Valley in South Germany. Afterwards it  
50 rapidly expanded throughout the maize cultivation regions in Northwestern Europe. In response to the expansion of  
51 NCLB in Europe, breeders improved commercial varieties by selecting for polygenic, quantitative resistances and by  
52 introgression of monogenic, race-specific resistance genes from genetic resources. The four main resistance genes  
53 introgressed are *Ht1*, *Ht2*, *Ht3* and *Htn1* (22). Different races of *S. turcica* are defined by their infection ability of a  
54 differentiation set of varieties harboring one of the four *Ht* genes. Race monitoring of more than 500 isolates revealed  
55 that *S. turcica* races are unequally distributed throughout Europe (23). Such a distribution raises the question whether  
56 the rapid expansion reflects a neutral demographic process like a repeated and independent introduction of different  
57 strains that were rapidly distributed by seed trade and agricultural practices, or a selection-driven adaptation to  
58 resistant host varieties that favored the rapid expansion of novel, virulent pathogen strains throughout Europe.

59 We investigated both hypotheses by characterizing the genomic diversity of *S. turcica* isolates collected from natural  
60 infections of different susceptible maize varieties (lacking any known *Ht* genes) that were cultivated throughout  
61 Europe in 2011 and 2012. Using phylogenetic analyses and coalescence models we identify different clonal lineages

62 throughout Central and Western Europe that are distinct from Kenyan isolates used for comparison. The overall  
63 genetic diversity of the most widespread European clonal lineage was not shaped by strong selection exerted by host  
64 resistance genes, but reflects a neutral, exponential growth.

## 65 Results

66 **Read mapping and variant discovery.** We sequenced a sample of 166 isolates (157.2 GB raw sequence) from 11  
67 different countries (Dataset S1) and subsequently removed 37 isolates because of low coverage or a high proportion  
68 of reads not mapping to the reference genome. Eight samples were technical replicates of the same isolate to estimate  
69 the sequencing error rate. After excluding low quality samples and replicates we obtained a final sample of 121  
70 isolates with an average read coverage of 14.9x and a range from 5.5x to 44.7x coverage. After mapping and calling  
71 SNPs with both GATK and samtools-bcftools, we identified 55,534 SNPs by both methods and retained 23,209 SNPs  
72 after filtering (Materials and Methods). SNPs with a maximum of 35% of missing data were imputed by multiple  
73 correspondence analysis (MCA) (24). The median number of SNPs differing between the eight technical replicates  
74 was 9.5 corresponding to 99.96% identity between replicates (SI Appendix, Table S1). To polarize SNPs into ancestral  
75 and derived variants we included *Bipolaris sorokiniana* and *Bipolaris maydis* as outgroups (25, 26). This data set was  
76 expanded by two *Setosphaeria turcica* reference genomes obtained from isolates Et28A and NY001 collected in the  
77 United States, which resulted in a total sample of 123 isolates. The data derived from this sample consisted of 4,257  
78 polarized SNPs, corresponding to 18.3% of non-polarized SNP data.

79 **Presence of different clonal lineages.** To determine the genetic relationship of *S. turcica* isolates we clustered the  
80 original 121 samples with ADMIXTURE into  $K = 5$  clusters (Fig. 1B). Five isolates had ancestry coefficients of <70%  
81 and were not assigned to clusters. All clusters defined by ADMIXTURE were supported by a rooted Neighbor-Joining  
82 tree based on polarized SNPs, a principal component analysis (PCA) and Community Oriented Network Estimation  
83 ((CONE), 27) (Fig. 1A-D). Three of the five ancestral clusters, which we named 'Big Clonal' (47 isolates), 'Small  
84 Clonal' (16 isolates) and 'French Clonal' (9 isolates), showed very short internal branches and the two remaining  
85 clusters, 'Diverse' (17 isolates) and 'Kenyan' (27 isolates), showed long internal branches in the phylogenetic tree.  
86 The NJ tree, PCA and Neighbor-Net reveal a close relationship of the French Clonal cluster with the Kenyan isolates  
87 and a strong differentiation from the other three European clusters (Fig. 1A,C,E and SI Appendix, Fig. S1). All five  
88 clusters, however, appear to have arisen by sexual recombination as indicated by reticulate patterns at the base of  
89 each clade in the Neighbor-Net (Fig. 1E).

90 We also observed genetic differentiation within clusters. ADMIXTURE identified two distinct subclusters within  
91 the Kenyan cluster ( $K = 7$ ), the Diverse cluster ( $K = 6$ ), and the Big Clonal cluster ( $K = 8$ ; SI Appendix, Fig. S1).  
92 CONE identified four connected subclusters within the Big Clonal cluster and two disconnected subclusters in the  
93 Diverse cluster (Fig. 1D). The latter may consist of distinct clonal lineages that originated by recombination as shown  
94 by the Neighbor-Net. In contrast, no recombination is evident within the Big Clonal cluster and its subclusters, which  
95 therefore reflect evolutionary lineages of independent mutations.

96 To test whether the four European genetic clusters are geographically clustered, we analysed the spatial auto-  
97 correlation with Moran's  $I$  using ADMIXTURE ancestry coefficients ( $K = 5$ ; Fig. 2A). Correlograms of Moran's  $I$

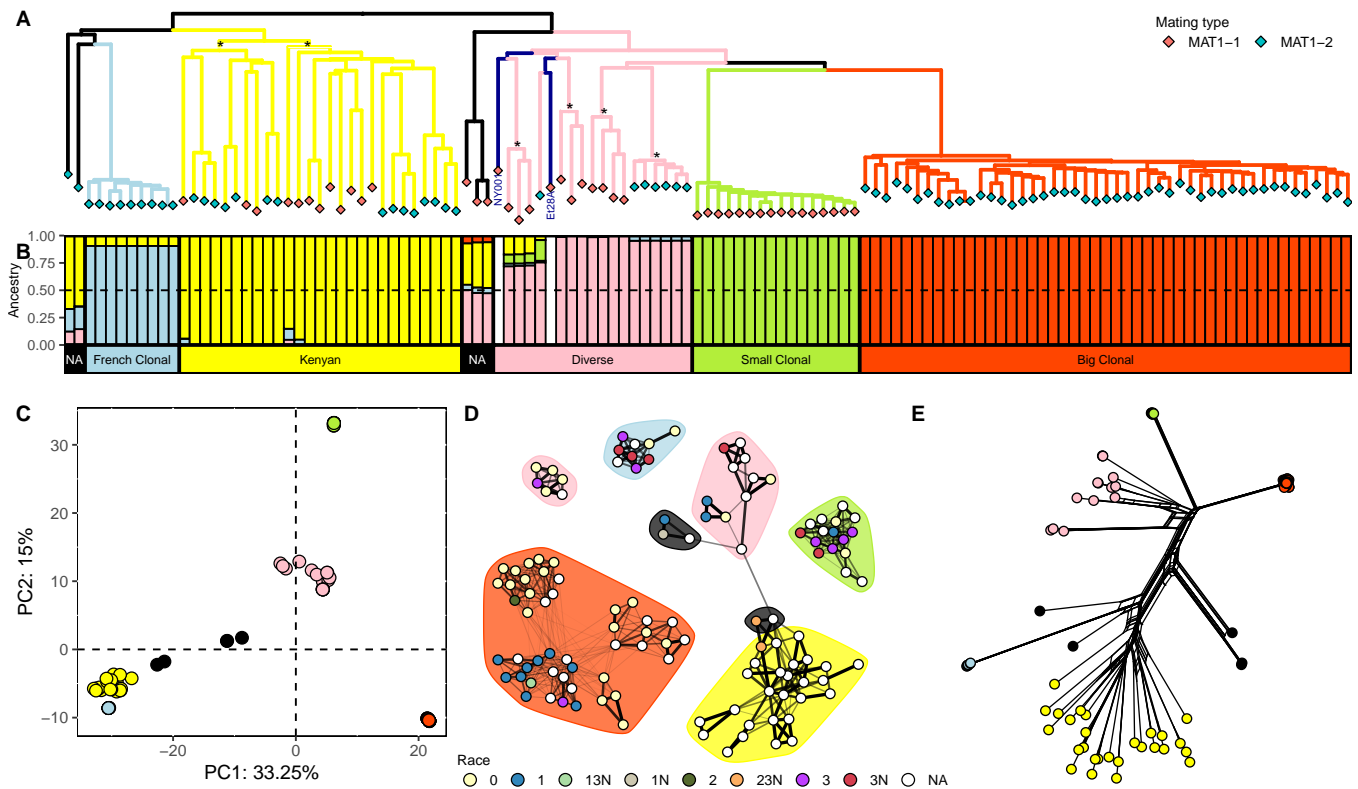

**Fig. 1. A)** Rooted Neighbor-Joining tree from the polarized SNP dataset, branches are colored according to the observed ADMIXTURE clusters, dark blue indicates the two reference genomes (NY001 and Et28A), \* sign indicates the subclusters within the major clusters (two subclusters in Kenyan and four in the Diverse cluster). Rhombuses in tip nodes are colored according to the mating type. **B)** Individual ancestry coefficients from ADMIXTURE for K=5 in the same order as the rooted NJ Tree. White gaps correspond to the two reference genomes which were not analysed in ADMIXTURE. NA show admixed individuals with no cluster assigned. **C)** First two axes of a PCA colored according to the five observed ADMIXTURE clusters. **D)** Population network created with CONE colored according the phenotyped race (NA in white for unknown race). Background color highlights the five ADMIXTURE classification clusters. **E)** Neighbor-Net created with SplitsTree colored according to the five observed ADMIXTURE clusters.

98 indicate a wide geographic distribution and absence of geographic clustering of the Diverse and Big Clonal clusters  
 99 (Fig. 2B). In contrast, the French Clonal cluster is strongly clustered in France and the Small Clonal cluster at  
 100 sampling locations within and between the Upper Rhine Valley and the border between Northwestern Austria and  
 101 Southeastern Germany.

102 **Mating type and recombination.** Sexual reproduction in *S. turcica* is controlled by the *MAT1* locus with the *MAT1-1*  
 103 and *MAT1-2* ideomorphs (28, 29), which are highly dissimilar alleles. Sequence reads from *MAT1-2* isolates do  
 104 not map to a *MAT1-1* reference (and vice versa) resulting in an alignment gap. To determine the mating type of  
 105 isolates we assembled all unmapped reads *de novo* into contigs and compared them with BLAST to a database of  
 106 *S. turcica* sequences that included both *MAT1-1* and *MAT1-2* alleles. Isolates were classified as either *MAT1-1* or  
 107 *MAT1-2* because all reads and contigs mapped to only one of the two mating types. Three clusters (Big Clonal,  
 108 Small Clonal and French Clonal) are fixed for one mating type, whereas the Kenyan and Diverse clusters each have  
 109 approximately 1:1 ratios of the two mating types, consistent with a history of sexual reproduction (Table 1). The  
 110 presence of different mating types as indicator of sexual reproduction is supported by the Phi recombination test,  
 111 which identified past recombination events in the Kenyan and Diverse, but not in the other three clusters (Table

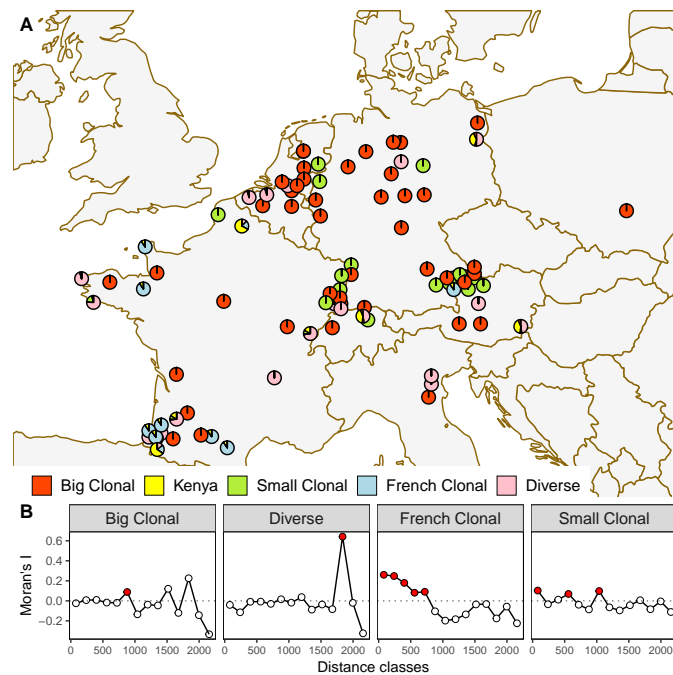

**Fig. 2. A)** Geographic origin of European isolates. Pie charts indicate ancestry coefficients for  $K = 5$  to show the geographic distribution of the five major genetic clusters. Geographically close isolates are shifted to avoid overlapping of pie charts. **B)** Correlogram of Moran's  $I$  of the European ancestry coefficient along different distance classes. In red,  $p$ -value of Moran's  $I < 0.05$

112 1). The test also detected recombination within the two Kenyan subclusters, of which each harbors both mating  
113 types in roughly equal proportions (Fig. 1A). We found no recombination within the four lineages of the Diverse  
114 cluster, consistent with the fixation one mating type within each lineage of this cluster. A permutation test on the  
115 standardized index of association,  $\bar{r}_d$ , rejected the null hypothesis of random association of alleles in all five clusters,  
116 suggesting that despite past episodes of sexual reproduction, the Diverse and Kenyan clusters also show high rates  
117 of asexual reproduction in recent time.

118 The geographic distribution of the two mating types is correlated with the geographic distribution of the four  
119 European clusters as the mating type is fixed within each of the three European clonal lineages. However, mating  
120 types of the Diverse cluster are unequally distributed with a higher proportion of *MAT1-1* in the Southeastern part  
121 and a higher proportion of *MAT1-2* in the Northwestern part of its sampling area (*SI Appendix*, Fig. S2)

122 **Differences in genetic diversity between clusters.** Consistent with their different histories of sexual and asexual  
123 reproduction, the five clusters also differ by their level of nucleotide variation (Table 1, Fig. 3A). Nucleotide diversity,  
124  $\pi$  and Watterson's estimator,  $\theta_W$ , are higher among the 26 isolates from Kenya (Genome-wide  $\pi = 6.631 \times 10^{-5}$ , per  
125 base pair) than among the 94 isolates from Europe ( $5.365 \times 10^{-5}$ ). Both clusters harbor a high proportion of SNPs not  
126 present in the other cluster because only 4,647 SNPs segregate in both clusters, corresponding to 33% and 39% of the  
127 SNPs of the Kenyan and European clusters, respectively.

128 SNP-based genetic diversity differs between the four European clusters (Table 1A). The Diverse cluster shows  
129 10 to 30 fold higher genetic diversity compared to the three clonal lineages. Its genetic diversity is 82% of the total  
130 European and 65% of Kenyan samples, respectively. Similar differences between the clusters are observed with

**Table 1. Diversity and reproduction type statistics of Kenyan and European isolates**

| Cluster       | <i>n</i> | <i>S</i> | $\pi$                  | $\theta_W$             | Tajima's <i>D</i> | <i>MAT1-1</i> : <i>MAT1-2</i> | Phi ( <i>p</i> -value) | $\bar{r}_d$ ( <i>p</i> -value) |
|---------------|----------|----------|------------------------|------------------------|-------------------|-------------------------------|------------------------|--------------------------------|
| Kenya         | 26       | 11,880   | $6.631 \times 10^{-5}$ | $7.852 \times 10^{-5}$ | -0.62             | 11 : 15                       | 0.0000                 | 0.001                          |
| Europe        | 94       | 14,094   | $5.365 \times 10^{-5}$ | $6.949 \times 10^{-5}$ | -0.78             | 29 : 65                       | -                      | -                              |
| Small Clonal  | 16       | 393      | $1.52 \times 10^{-6}$  | $2.99 \times 10^{-6}$  | -2.15             | 16 : 0                        | 0.4873                 | 0.001                          |
| French Clonal | 9        | 215      | $1.47 \times 10^{-6}$  | $2 \times 10^{-6}$     | -1.38             | 0 : 9                         | 0.1034                 | 0.001                          |
| Diverse       | 17       | 5,631    | $4.445 \times 10^{-5}$ | $4.201 \times 10^{-5}$ | 0.25              | 10 : 7                        | 0.0000                 | 0.001                          |
| Big Clonal    | 47       | 1,514    | $3.11 \times 10^{-6}$  | $8.65 \times 10^{-6}$  | -2.36             | 0 : 47                        | 0.9229                 | 0.001                          |

Diversity statistics: *S*: number of segregating sites,  $\pi$ : nucleotide diversity per bp,  $\theta_W$ : Watterson's estimator per bp, *D*: Tajima's *D*. Results are rounded to the number of presented digits. Reproduction type statistics: *MAT1-1* : *MAT1-2* as matying type counts. Phi (*p*-value): *p*-value of the Phi recombination test.  $\bar{r}_d$

(*p*-value): *p*-value of the standardized test of random association of alleles.

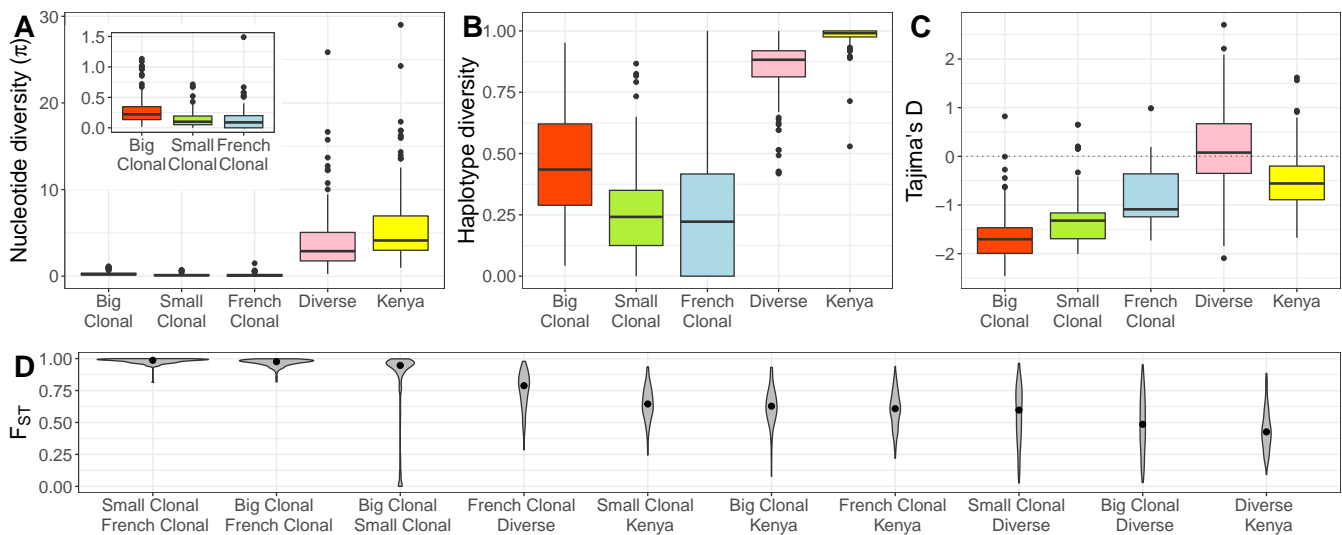

**Fig. 3.** Levels of genetic diversity in five different genetic clusters defined by ADMIXTURE  $k = 5$ . **A)** Nucleotide diversity  $\pi$  per bp (in units of  $10^{-6}$ ), **B)** haplotype diversity, **C)** Tajima's *D*, and **D)** pairwise *F<sub>st</sub>* calculated in windows of 250kb. The inset plot in (A) zooms into the *y* axis for the three first clusters (same units).

haplotype diversity (Fig. 3B). Tajima's *D* values of the Big and Small Clonal clusters are highly negative ( $< 2$ ) and less negative in the French Clonal cluster (-1.4; Table 1, Fig. 3C). The negative Tajima's *D* values of the clonal lineages indicate a genome-wide excess of rare alleles that may be caused by demographic effects like population growth following recent emergence or genome-wide purifying selection. The first explanation was proposed for similar patterns in clonal lineages of other plant pathogens (e.g., 13). Genetic differentiation of SNPs was measured as *F<sub>st</sub>* and was highest between clonal lineages and smaller between the clonal lineages and the Diverse and Kenya clusters, respectively (Fig. 3D).

The five clusters also differ in the distribution of genetic diversity along the genome. The Big Clonal, Small Clonal and French Clonal clusters have numerous genomic regions devoid of any genetic variation, whereas variation is more uniformly distributed in the Diverse and Kenyan clusters (SI Appendix, Figs. S3, S4 and S5). The lack of diversity is particularly strong for the Small Clonal and French Clonal clusters, because only 3% (Small Clonal)



**Table 2. McDonald-Kreitman test**

| Cluster       | $\pi_N/\pi_S$                                       | $P_n/P_s$        | $D_n/D_s$       | NI    | <i>p</i> -value |
|---------------|-----------------------------------------------------|------------------|-----------------|-------|-----------------|
| Big Clonal    | 0.747 ( $1.30 \times 10^{-6}/1.80 \times 10^{-6}$ ) | 1.648 (201/122)  | 1.366 (168/123) | 1.206 | 0.283429        |
| Small Clonal  | 2.123 ( $8.00 \times 10^{-7}/4.00 \times 10^{-7}$ ) | 5.455 (60/11)    | 1.480 (182/123) | 3.686 | 0.000055        |
| French Clonal | 0.299 ( $4.00 \times 10^{-7}/1.30 \times 10^{-6}$ ) | 2.818 (31/11)    | 1.653 (390/236) | 1.705 | 0.185753        |
| Kenya         | 0.506 ( $2.47 \times 10^{-5}/4.88 \times 10^{-5}$ ) | 1.734 (1278/737) | 1.395 (113/81)  | 1.243 | 0.161458        |

$\pi_N/\pi_S$  is the ratio of non-synonymous to synonymous nucleotide diversity; *P*: population polymorphisms; *D*: fixed derived mutations (reference Et28A as outgroup); *n*: non-synonymous mutations, *s*: synonymous mutations; *NI*: Neutrality Index, calculated as  $(P_n/P_s)/(D_n/D_s)$ ; *p*-value: Fisher's exact test *p*-value

142 and 1% (French Clonal) of all 100 kb windows on the 15 longest scaffolds of the reference genome segregate for  
143 five or more SNPs. For the clonal lineages, most windows reflect the genome-wide negative Tajima's *D* values  
144 and there are no visible outliers with highly negative Tajima's *D* values that may reflect strong localized selective  
145 sweeps (*SI Appendix*, Fig. S6). In contrast, both the Big and Small Clonal clusters have windows with highly positive  
146 Tajima's *D* values (e.g. on scaffolds 4 and 10), which may indicate mapping errors caused by structural variants or  
147 strong balancing selection (*SI Appendix*, Table S2). However, these regions contain only very few ( $\leq 5$ ) SNPs and, for  
148 the Big Clonal cluster, outlier Tajima's *D* values do not deviate significantly from a neutral model of a constant or  
149 exponentially growing population (*SI Appendix*, Text A, Table S3).

150 **Tests of selection.** To investigate whether the genetic clusters were affected by positive or purifying selection, we  
151 applied the McDonald-Kreitman (MK) test and compared synonymous and non-synonymous variation among  
152 isolates relative to the reference genome Et28A (Table 2). Although ratios of non-synonymous and synonymous  
153 substitutions ( $D_n/D_s$ ) are usually used for interspecific comparisons, they can also be interpreted for well separated  
154 clonal lineages (30). The Et28A reference clusters with the Diverse cluster, thus they are not well separated and  
155 we did not perform the analysis for the Diverse cluster. The ratio of synonymous to non-synonymous nucleotide  
156 diversity ( $\pi_N/\pi_S$ ) estimates the fraction of effectively neutral mutations among all mutations (31) under Ohts's  
157 nearly neutral model (32). The Big Clonal, French Clonal and Kenyan clusters show  $\pi_N/\pi_S$  ratios below 1 indicating  
158 that a majority of mutations are non-neutral or nearly neutral. Variation in the Small Clonal cluster differs from  
159 a nearly neutral model with a ratio  $\pi_N/\pi_S = 2.1$  and a much higher ratio of non-synonymous to synonymous  
160 mutations,  $P_n/P_s = 5.5$  than the other clusters (Table 2). However, with the exception of the Small Clonal Cluster  
161 ( $p < 0.0001$ ), a MK test does not reject the null hypothesis of neutral evolution indicating that purifying selection has  
162 no significant effect on the fate of mutations in four of the five genetic clusters of our sample, which is unexpected  
163 given the  $\pi_N/\pi_S$  ratios observed.

164 **Inference of split times.** To investigate the demographic history of European isolates we included the two North  
165 American isolates Et28A and NY001 and used the polarized SNP data. A rooted tree revealed a close relationship of  
166 the American and European isolates (Fig. 1A), which was independently confirmed by merging our resequencing  
167 data with genotyping by sequencing (GBS) data of 13 North American isolates (33) resulting in a set of 280 genome-  
168 wide SNPs (*SI Appendix*, Fig. S7). The resulting phylogenetic tree and PCA plot (*SI Appendix*, Fig. S7) of the merged  
169 dataset are essentially identical to the analyses of European isolates based on the complete sequencing data. Both

170 methods group the North American isolates with the Diverse cluster, consistent with the tree in Fig. 1A.

171 To test whether European clonal lineages split before or after their introduction to Europe we estimated divergence  
172 times between the five clusters (times back to the most recent common ancestor, MRCA, of a pair of clusters) and  
173 emergence times of clonal lineages within clusters (times back to the MRCA of each cluster) using BEAST (Fig. 4A  
174 and *SI Appendix*, S8). The three clonal clusters diversified quite recently with posterior mean emergence of the most  
175 recent common ancestor in the year 1985 for the Big Clonal (1978-1990 include  $\geq$  95% posterior mass with highest  
176 posterior density, 95%HPI), 1998 for the Small Clonal (1993-2001, 95%HPI) and 1999 for the French Clonal (1995-2002,  
177 95%HPI) clusters. Split times between clusters are more distant and range from the year 1609 between Small Clonal  
178 and Big Clonal (1480-1809, 95%HPI), 1503 between the ancestors of Big Clonal, Small Clonal and the Diverse cluster  
179 (1456-1667, 95%HPI) to 1198 between the ancestors of the Big Clonal, Small Clonal, North American reference isolates  
180 and French Clonal (975-1368, 95%HPI). The Diverse cluster emerged much later than the clonal clusters in 1520  
181 (1386-1624, 95%HPI) and the nodes of its genealogical tree are more spread over time. Split times and tree topology  
182 of the BEAST analysis agree with the phylogeny in Fig. 1A and support a much closer pairwise relationship of Big  
183 Clonal and Small Clonal than to the French Clonal cluster. Including non-clonal lineages in analyses to estimate  
184 split and emergence times may introduce a bias due to reticulate events (13). To test for such a bias, we included  
185 only the Big Clonal, Small Clonal, and French Clonal clusters with and reference genome in a BEAST analysis. We  
186 obtained the same phylogeny as in Figure 4A and split time estimates that are slightly more in the past (*SI Appendix*,  
187 Table S4 and *SI Appendix*, Figs. S9 and S10). This comparison shows that time estimates are robust with respect to the  
188 mode of reproduction. We then investigated whether the global expansion of maize cultivation after the beginning of  
189 the Columbian exchange in 1492 and the strong increase of maize cultivation in Europe during recent decades was  
190 accompanied by an increase of the effective pathogen population size,  $N_e$ . After adding global population size as  
191 parameter to the phylogenetic model for BEAST median, posterior estimates of  $N_e$  changed substantially over time  
192 (Fig. 4B and *SI Appendix*, Figure S8). Estimates of  $N_e$  based on the European samples, three samples from Kenyan  
193 cluster and the North American reference sequence indicate a long phase of population growth since the time of  
194 the most recent common ancestor (MRCA) of the European samples about 825 years ago until a period between  
195 1859 and 1900, followed by a population decline until 1999, when population size  $N_e$  was lower than at the time of  
196 the MRCA. This decline was then followed by a very recent epoch of a strong population growth for 20 years until  
197 the last sampling date 2012. A recent, rapid growth is consistent with strongly negative genome-wide Tajima's  $D$   
198 values within the three European clonal clusters. A decline of  $N_e$  followed by recent strong growth was confirmed by  
199 analysing only Big Clonal, Small Clonal, and French Clonal clusters together with the reference genome (*SI Appendix*,  
200 Figs. S9 and S10).

201 **Neutral versus selection-driven population dynamics.** The low genetic diversity and genome-wide excess of rare  
202 polymorphisms within clonal lineages may reflect rapid population growth or result from recurrent, short phases in  
203 which newly emerged genotypes with a skewed offspring distribution become dominant. Among predominately  
204 asexually reproducing fungal pathogens, following processes may lead to a skewed offspring distribution even  
205 without population size changes: (i) rapid selection of newly emerged genotypes with a very high fitness coefficient  
206 (34), (ii) a large number of offspring originating by chance from a single parental genotype analogous to sweepstake



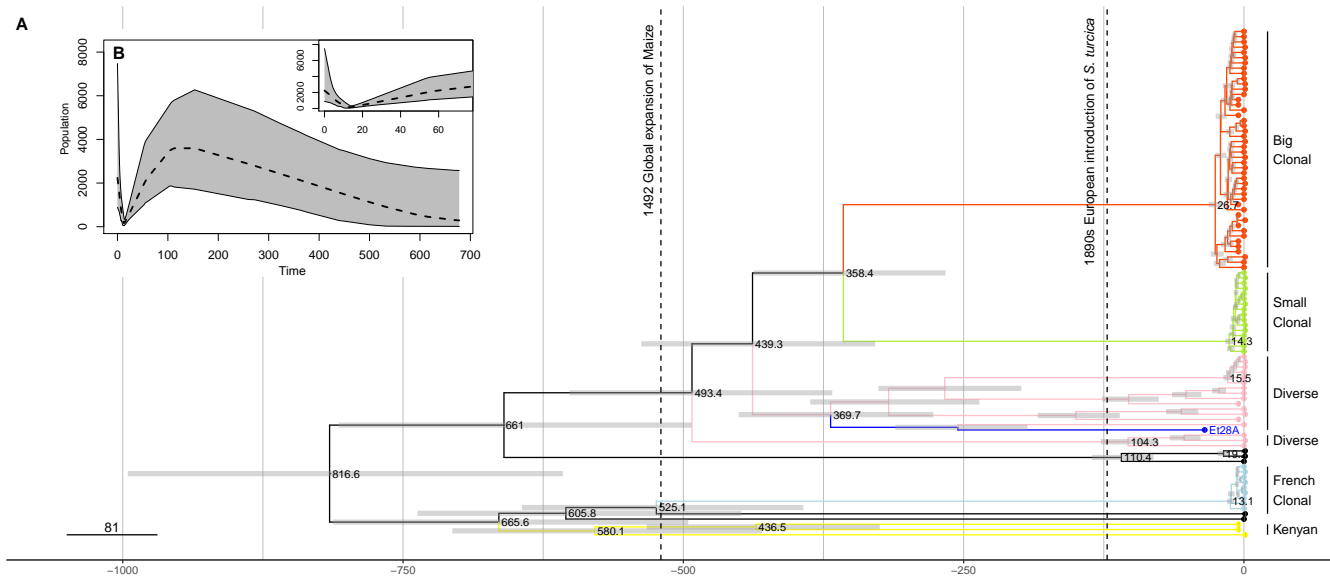

**Fig. 4. A)** Dated phylogeny obtained with BEAST, using all European isolates, reference genome Et218A (in dark blue) and three samples from Kenyan cluster. Time is given as years before 2012, the year of the most recent sampling. Horizontal gray bars show the 95 % highest posterior density intervals (95% HPI) for split times. **B)** Extended Bayesian skyline plot obtained with BEAST for the analysis from (A). The inset zooms into the most recent past. Time runs backwards from 2012. The dashed line shows the median posterior population size, while the gray area shows the 95% HPI.

207 reproduction in marine species (35, 36), or (iii) a large number of offspring from genotypes that evolved virulence  
 208 against monogenic resistance genes present in maize varieties (boom-bust cycles) (37). Genealogies in these cases  
 209 can be modeled as multiple-merger coalescents. We compared these models with a standard Wright-Fisher type  
 210 reproduction with growing population sizes, modeled via a bifurcating Kingman coalescent with exponential growth.  
 211 For the Big Clonal and Kenyan clusters we compared both coalescent models using SNPs segregating within this  
 212 cluster on the five largest scaffolds of the current *S. turcica* reference genome using a Random Forest Approximate  
 213 Bayesian Computation (RF-ABC) approach for model comparison and parameter estimation. In the other clusters  
 214 we observed high prior error rates and low posterior probabilities and considered these results not as robust (*SI*  
 215 *Appendix*, Table S5). Table 3 shows the results of the RF-ABC analysis. For the Big Clonal cluster, it provides strong  
 216 support for a bifurcating Kingman coalescent with strong exponential growth over a multiple merger coalescent,  
 217 which refutes strong selection without growth or sweepstake reproduction. The Kingman coalescent is also preferred  
 218 for the Kenyan cluster, but with much smaller growth rates. All scaffolds in the Big Clonal and in the Kenyan cluster  
 219 show 'positive' ( $\geq 3$  odds ratio) to 'strong' support ( $\geq 20$  odds ratio, only for Big Clonal) for an exponential growth  
 220 model over a multiple merger model according to the Kass-Raftery scale (38). Simulations showed that the observed  
 221 genetic diversity in both the Kenyan and Big Clonal clusters are obtained with the best-fitting model (*SI Appendix*,  
 222 Text B, Figs. S11 and S12).

223 Although our analyses reject the hypothesis that skewed offspring distribution alone shapes genetic diversity  
 224 for the Big Clonal and Kenyan clusters, a combination of exponential growth with skewed offspring distributions  
 225 explains the data similarly well as neutral population growth (*SI Appendix*, Text C).

**Table 3. RF-ABC model selection results**

| Cluster    | SNP count | Mean OOB | Post. prob. Exp. growth | Odds ratio | Fitted rate $g$ |
|------------|-----------|----------|-------------------------|------------|-----------------|
| Big Clonal | 92-128    | 21-22%   | 83 - 98%                | 4.9-49     | 181-630         |
| Kenya      | 683-1007  | 20%      | 75.2 - 84.3%            | 3-5.4      | 5.5-8.5         |

Mean OOB is the out-of-bag prior error rate for model classes, averaged over all model classes. Post. prob. exp. growth gives the posterior probability of the exponential growth model. Fitted parameter  $g$ : Posterior median of the exponential growth parameter in coalescent units, where one unit represents  $2N$  generations. For each variable, we report the range of values for the five biggest scaffolds. For the transformation of posterior probabilities into odds ratios for a comparison of exponential growth vs. any other genealogy model used, see Materials and Methods.

226 **Different pathogen races within clonal lineages.** To test whether isolates within clonal lineages belong to the same  
227 or different races, we identified 62 isolates in our sample whose race was determined in a race monitoring of 542  
228 European *S. turcica* isolates collected in 2011 and 2012 from the major maize growing regions in Europe (23). The  
229 monitoring revealed that race 0 was the most dominant with 45% of isolates, followed by race 1 (22%), 3 (15%) and  
230 3N (14%). Only 4% of isolates were virulent against two or more resistance genes (races 13, 123, 23, 2, 23N, 12, 1N  
231 and 13N). Mapping the race type of the 62 isolates onto the CONE network reveals that Big and Small Clonal clusters  
232 harbor four races each and the French Clonal cluster three races (Fig. 1D). Single, independent *de novo* mutations  
233 in pathogen effector genes are sufficient to create new races and may explain the diversity of races within clonal  
234 lineages. Alternatively, the presence of the same races in different lineages may reflect shared polymorphisms that  
235 originated in ancestral populations although such an explanation seems unlikely given the low genetic diversity  
236 within clonal lineages (Table 1).

237 **Identification of divergent regions and structural variants.** The differences in SNP allele frequencies between clonal  
238 lineages suggests that highly divergent genomic regions and presence absence structural variants (PAVs) also  
239 contribute to genomic differentiation. We therefore used sequence read coverage and  $k$ -mer frequencies to identify  
240 highly divergent regions and PAVs. First, we calculated for each isolate its sequence coverage of the reference genome  
241 in 43,443 windows of 1 kb length and expressed coverage as percent bases covered by at least one sequence read  
242 in each window. Windows with low coverage indicate a high proportion of mapping gaps in the reference and  
243 windows with a highly variable coverage between isolates pinpoint structural variants. Using the top 2.5% windows  
244 ( $n = 1,012$ ) with the most variable sequence coverage between isolates, we constructed a NJ tree from a pairwise  
245 Euclidean distance matrix of reference sequence coverage (SI Appendix, Fig. S13) to cluster isolates with similar  
246 variation in coverage. The topology of the resulting tree is highly similar to the rooted SNP-based tree indicating that  
247 highly variable regions and PAVs reflect similar genealogical process than SNP allelic variation.

248 To identify genomic regions that differentiate pairs of clonal clusters we used HAWK (39), which identifies  $k$ -mers  
249 whose frequency differs between clusters. Among all pairwise comparisons (see Methods), we obtained different  
250  $k$ -mer frequencies only between the Big Clonal vs. Small Clonal clusters. Among 6,341  $k$ -mers that differentiate  
251 the two clusters, 3,048 are associated with the Big and 3,293 with the Small Clonal cluster. We *de novo* assembled  
252 both  $k$ -mer clusters independently into longer sequence contigs and found that 93% of assembled  $k$ -mers mapped

253 to few, distinct regions of the reference genome, suggesting that a small number of genomic regions contribute to  
254 genomic differences between the two clusters. Assembled  $k$ -mers mapped to only 1,167 (12.73 %) 10kb windows of  
255 the reference genome. There were only 30 windows (0.33% of all windows) that collected the top 2.5%  $k$ -mer counts  
256 with at least 9.85 mapped  $k$ -mers per window. Among all mapped  $k$ -mers, 25% map to these 30 windows, which  
257 tend to be highly repetitive. A majority of 22 out of 30 windows (73%) is highly repetitive with  $\geq 50\%$  repetitive  
258 elements and no window contains gene-rich regions.

259 To identify proteins that may differentiate the Big and Small Clonal clusters, we conducted a BLASTX analysis  
260 against a non-redundant BLAST protein database with the remaining unmapped  $k$ -mers. For both clusters, 'hy-  
261 pothetical protein' was the most frequent annotation of proteins among the five best hits with a cutoff  $e$ -value of  
262  $< 0.001$ , followed by the mating type *MAT1-2* for the Big Clonal cluster. The latter finding is a positive control of  
263 the  $k$ -mer mapping approach because Big Clonal has *MAT1-2*, which does not map to the reference genome Et28A,  
264 and Small Clonal has *MAT1-1*, which maps to the reference genome. For the Small clonal cluster, the second most  
265 frequent BLAST hit was 'polyketide syntase protein', which is potentially associated with pathogen virulence (25).  
266 We also used the race assignment to identify  $k$ -mers associated with race-specific genes, however no significant  
267 and robust outcome was found (Table S6). This negative result may either reflect a too small sample size or genetic  
268 differences of single or few variants that are not uncovered by the analysis of  $k$ -mers.

## 269 Discussion

270 Our work confirms earlier studies of *S. turcica* genetic diversity and mode of reproduction in Europe and Africa  
271 (21, 40). Isolates originating from Kenya form a single cluster with high genetic diversity, equal frequency of both  
272 mating types and genomic patterns of recombination consistent with a higher rate of sexual reproduction of *S. turcica*  
273 in tropical climates. In contrast, European isolates are composed of four distinct clusters, which differ by their relative  
274 frequency and geographic distribution. Three clusters (Big Clonal, Small Clonal, French Clonal) represent single  
275 clonal lineages, whose genetic diversity is very low, do not show evidence of recent recombination, and are fixed for  
276 one of the two mating types. The fourth cluster (Diverse) consists of diverse clonal lineages that, taken together, have  
277 a high level of genetic diversity, evidence of past recombination and an equal frequency of both mating types. These  
278 three characteristics in combination with low  $F_{ST}$  values between the Diverse vs. the Big Clonal and Small Clonal  
279 clusters, respectively, suggest that the Diverse cluster is a source of genetic diversity from which clonal lineages  
280 emerged previous to the arrival of *S. turcica* in Europe. The two North American isolates Et28A and NY001 cluster  
281 with the Diverse cluster and are highly similar to different European isolates indicating the close connection between  
282 European and American samples that may reflect an American origin of the Big Clonal, Small Clonal and Diverse  
283 clusters. In contrast, the French Clonal cluster is closely related to the Kenyan cluster and therefore likely has the  
284 same origin. A previous study interpreted the presence of African alleles in an isolate from Southwestern France of *S.*  
285 *turcica* as recent migration (21). This is not supported by our analysis because the split time of Kenyan and French  
286 Clonal clusters predates the arrival of *S. turcica* in Europe, and their close relationship reflects a common ancestry  
287 instead of recent migration.

288 Our divergence time estimates suggest that individual lineages within each of the three Big Clonal, Small Clonal

289 and French Clonal clusters emerged less than 40 years ago. Although these very recent emerge times are based on  
290 a limited sample we consider them reliable (41) (*SI Appendix, Text D*). In contrast, the divergence times of the five  
291 clusters identified in our sample are more distant and range between 816 to 360 years ago (Fig. 4), which predates  
292 the introduction of *S. turcica* into Europe and strongly suggests these clusters originated outside Europe and were  
293 independently introduced. The clonal sublineages within the Diverse cluster originated between 370 to 50 years ago  
294 and are separated by sexual recombination events, which are unlikely under European climatic conditions. For this  
295 reason, they were likely independently introduced into Europe.

296 **Evolutionary forces determining pathogen demography.** Although multiple crop pathogens expanded globally in  
297 short time, only few studies analysed the evolutionary forces determining expansions, in particular the role of  
298 selection on plant pathogens, using explicit population genetic modeling (42). We employed Approximate Bayesian  
299 Computation (ABC) to compare two coalescent models and to differentiate between a neutral model of exponential  
300 growth and a selection-based model of the *S. turcica* expansion in Europe. Simulations of models with asexual  
301 reproduction demonstrate a high power of ABC to differentiate between neutral and selection-driven demographies  
302 with suitable summary statistics (43). The Big Clonal cluster is particularly interesting for such an analysis because  
303 it is the most successful cluster in terms of sample frequency and geographic distribution in Europe. Its large  
304 sample size provides better statistical power and a restriction of ABC to clusters without a strong internal population  
305 structure removes a bias in distinguishing among genealogy models (44). The ABC analysis of the Big Clonal cluster  
306 (Table 3) reveals a recent population size increase and in addition that observed genetic diversity in this cluster is  
307 not consistent with a history of rapid selection or boom-bust cycles caused by host-pathogen coevolution without  
308 population growth. In other fungal crop pathogens such as *Zymoseptoria tritici* random fluctuations in fecundity and  
309 a potential for very large offspring numbers per individual have been proposed (36), which should lead to a multiple  
310 merger genealogy if it is strong enough. Our results exclude such a model as sole explanation for the observed  
311 diversity in the Big Clonal Cluster or indicate that fecundity differences in the pathogen are too small to affect the  
312 shape of the genealogy. Instead, observed diversity within this cluster can be explained by just assuming neutral  
313 population growth. These analyses do not exclude the possibility that an exponential increase of  $N_e$  in the Big Clonal  
314 cluster results from a relative fitness advantage caused by adaptive *de novo* mutations or a favourable combination of  
315 adaptive mutations achieved via sexual recombination in the founders of the cluster. In addition, a more complex  
316 pattern of neutral population growth on top of selection processes or sweepstake reproduction can also not be ruled  
317 out. Since the Kenyan cluster also supports a neutral coalescent model with a low rate of population growth there is  
318 no reason to expect multiple mergers as standard gene genealogies in *S. turcica*. The absence of interpretable results  
319 for the ABC analyses for the Small Clonal and French Clonal clusters likely results from too small sample sizes.

320 Tests of neutrality based on comparisons of non-synonymous and synonymous genetic diversity (Table 2) do  
321 not contradict a model of neutral evolution as main driver of genetic diversity for the Big Clonal, French Clonal  
322 and Kenyan clusters. Although there is an excess of non-neutral diversity in these clusters, it is not strongly selected  
323 against as indicated by non-significant MK test results. This seems contradictory at first, but may have several  
324 explanations: clonality preventing efficient selection against deleterious mutants, a surplus of beneficial founder  
325 mutations offsetting the effect of purifying selection (this may need many such mutations and thus be unlikely) or

326 simply an underpowered MK test. Nevertheless, it shows that even if there is purifying selection, it is not a main  
327 driver of genetic diversity within these clusters. The Small Clonal cluster, however, may have a different evolutionary  
328 history because the significant MK test result for purifying selection contrasts with an excess of non-synonymous  
329 diversity, which suggests that evolution in this cluster does not follow a nearly-neutral model. Overall *S. turcica*  
330 genetic clusters do not provide evidence for strong purifying selection, which is in contrast to the rice fungal pathogen  
331 *Magnaporthe oryzae* (11). Taken together, absence of selection as main driver for the genetic diversity of the Big Clonal  
332 cluster and a close temporal coincidence of *S. turcica* population growth with an expansion of maize cultivation in  
333 Europe leads us to propose that the expansion of this cluster was not driven by rapid evolutionary adaptation to  
334 European maize varieties or the environment.

335 **Limited evidence for host-pathogen co-evolution in Europe.** Our sample of isolates was collected in 2011 and 2012  
336 and represents a snapshot in time and space that is restricted to Europe and Kenya. Both factors limit further  
337 interpretations of our results and lead to questions about the role of *S. turcica* - maize coevolution within and outside  
338 Europe. First, the demographic analysis suggests an independent and recent single introduction of the French Clonal,  
339 Small Clonal and Big Clonal clusters into Europe (Table 3), although our results are also consistent with independent,  
340 repeated introductions of the same clonal lineages. For example, the clonal lineages within the Diverse cluster  
341 originated by sexual recombination over an extended period of time (Fig. 4). Since sexual recombination is unlikely  
342 under European climatic conditions, the lineages likely originated outside Europe and were then subsequently  
343 introduced. Further evidence for repeated introductions is the high genetic similarity among European and North  
344 American isolates suggesting recent exchange or a common origin in a different region, such as Mexico, because  
345 European isolates were more similar to Mexican than to Kenyan isolates (21). Additional samples from putative  
346 regions of origin such as Central America and tropical Africa are required to resolve this issue.

347 A second question refers to the effects of maize resistance genes on *S. turcica* evolution and epidemiology. There is  
348 no association between the five genetic clusters and the distribution of *S. turcica* races among these clusters. This  
349 observation and a high proportion of race 0 (i.e., non-virulent against four tested *Ht* genes) isolates in all five clusters  
350 shows that race-specific virulence did not generate new pathogen lineages with a strongly increased fitness. In  
351 combination with the evidence for neutral evolution of genetic variation in the European isolates, we conclude that  
352 strong selection against qualitative or quantitative maize resistances had very little or no effect on genetic diversity  
353 in Europe. However, future studies should associate the genetic diversity of host and pathogen genomes using joint  
354 association analysis (e.g., 45) to elucidate the role of genotype by genotype (GxG) effects in the spatial and temporal  
355 dynamics of host-pathogen interactions. Such information will contribute to avoid breakdown of resistance genes  
356 and achieve long-term resistance management (46).

357 A third question refers to the evolution of new races, because the presence of multiple races within the five *S.*  
358 *turcica* clusters suggests a rapid and repeated breakdown of *Ht*-based monogenic resistances in maize varieties (Fig.  
359 1D). Since selection against host resistance does not seem to affect the evolutionary dynamics of *S. turcica*, a frequent  
360 origin of new races may be facilitated by a high mutation rate, which we estimated as posterior mean substitution  
361 rate of  $10^{-4}$  substitutions per year per site using BEAST. This rate is much higher than in *Magnaporthe oryzae*, where it  
362 was estimated to be in the order of  $10^{-8}$  (11)). We used *k*-mer based association analysis to identify genomic regions



363 that may contribute to resistance breakdown, but did not find *k*-mers that are significantly associated with race  
364 type, possibly because of a small sample size for each race. In contrast, a *k*-mer analysis of the complete sample  
365 unambiguously identified the mating type gene and several genomic regions that differentiate clonal groups and  
366 harbor genes with putative roles in pathogenicity.

367 In conclusion, our analyses indicates a rapid spread of different *S. turcica* clonal lineages in Central and Western  
368 Europe in the absence of both recombination and strong selection for pathogen virulence. Monitoring of pathogen  
369 diversity on larger geographical scales and over time is required to fully understand forces influencing pathogen  
370 epidemiology and evolution, and the evolution of pathogen races. However, our work shows that large scale  
371 sequencing and population genomic analysis provide useful information to develop breeding programs informed by  
372 host-pathogen evolution and to control plant pathogens by improved agricultural management.

## 373 **Materials and Methods**

374 **Cultivation of fungal isolates.** The origin and sampling information of isolates is described in Dataset [S1](#) Lyophilized  
375 isolates were transferred to Becton Dickinson BBD Potato Dextrose Agar plates and incubated for at least 10 days  
376 at 25°C and a 12h light / 12hr dark cycle until plates were completely covered by mycelia. This fungal tissue was  
377 scraped from the surface with a spatulum and collected in a 2 ml plastic reaction tube.

378 **DNA extraction and NGS sequencing.** After adding six ceramic beads (2.8 mm diameter; MoBio, USA) to each  
379 tube, the tissue was ground in a Retsch mixer mill (MM400) for 30 sec at a speed of 30 sec<sup>-1</sup>. The DNA was  
380 then extracted with the Micro AX Blood Gravity KI (A&A Biotechnology, Poland; Cat. No. 101-100) according to  
381 manufacturer's instructions and diluted to a concentration of 2.5 ng μl<sup>-1</sup> EB buffer. Whole genome sequencing libraries  
382 were generated using a multiplex tagmentation protocol ([47](#)) with minor modifications. Our detailed protocol is  
383 available at protocols.io at and the assignment of barcodes to isolates as detailed in Dataset [S1](#). The libraries were  
384 paired-end sequenced (2 × 100 bp) on a HiSeq 2500 Illumina sequencer (Macrogen, Korea) in three batches of 24, 96  
385 and 46 isolates, respectively.

386 **Read mapping and variant calling.** Raw Illumina reads were processed for sequence quality using Trimmomatic  
387 v0.36 ([48](#)) with arguments ILLUMINACLIP:NexteraPE-PE2:30:10:8 CROP:98 HEADCROP:8 LEADING:28 TRAILING:28  
388 SLIDINGWINDOW:15:28 MINLEN:40 AVGQUAL:30. Read pairs for which both forward and reverse passed quality  
389 control were kept for further analysis. Trimmed reads were mapped with BWA v0.7.12-r1039 ([49](#)) against the  
390 *Setosphaeria turcica* reference genome Et28A v1.0 (race 23N strain 28A) ([25](#), [26](#)). The reference consists of 403  
391 scaffolds and was obtained from EnsemblFungi version 39 ([50](#)). PCR duplicates were removed with MarkDuplicates  
392 from Picard tools (<http://broadinstitute.github.io/picard/>) and mapped reads locally realigned with GATK v3.7-0 ([51](#)).  
393 Mean percentage of mapped reads and mean coverage were calculated with Qualimap v2.2.1 ([52](#)). Samples with  
394 low percentage of mapping reads (<83%) and/or low coverage (<5X) were excluded to avoid the analysis of  
395 contaminated samples. For variant calling we used two different methods and only kept variants identified by  
396 both methods. Genotypes were called for each sample with GATK HaplotypeCaller (-emitRefConfidence GVCF  
397 -min\_base\_quality\_score 28 -min\_mapping\_quality\_score 20 -ploidy 1), and genotypes were merged with



398 GenotypeGVCFs (-ploidy 1). As second method samtools mpileup (53, 54) (-t DP -t SP -t AD -g -C 50 -A -E  
399 -q 20 -Q 28) was used with bcftools (55) (-mv -ploidy 1). Insertion-deletion (INDEL) variants were excluded with  
400 vcftools (56) (-remove-inde1s). We kept overlapping SNPs between GATK and samtools-bcftools methods using  
401 bcftools isec. SNPs were filtered for minimum read depth of 3 and a maximum of 100, minimum proportion of reads  
402 supporting a genotype call of 0.8, maximum percentage of missing data per SNP of 35%. Monomorphic positions  
403 within the sample set and also all non bi-allelic SNPs were excluded. Missing genotypes were imputed with multiple  
404 correspondance analysis (MCA) using five components with the function 'imputeMCA' of the missMDA (57) R  
405 package. The number of differences between imputed replicates were counted to estimate the error in the final SNP  
406 dataset.

407 **Variant polarization.** To polarize alleles we used the reference genomes of two closely related species, *Bipolaris*  
408 *sorokiniana* ND90Pr (25, 26) and *Bipolaris maydis* ATCC 48331 (25, 26) that were both obtained from EnsemblFungi.  
409 Outgroup genomes were aligned with *Setosphaeria turcica* reference genome using TBA (58). Genotype calling from  
410 the alignment was done with MafFilter (59) with VcfOutput option using *Setosphaeria turcica* scaffolds for variant  
411 location and alignments larger than 500 bp. Only bi-allelic variants shared with both outgroup species were kept.  
412 Ancestrality of the alleles was assigned to the allele of the outgroup species and genotypes of the 130 samples (129  
413 isolates and *S. turcica* reference genome) were polarized accordingly. Additionally, we included the draft genome of  
414 *S. turcica* (race 1 strain NY001; JGI Fungal Program (60, 61) under GOLD Project ID Gp0110874), originally collected  
415 in Freeville, New York in 1983 (62) as additional sample to the polarized SNP dataset.

416 **Mating type assignment.** The *S. turcica* Et28A reference genome is of mating type *MAT1-1*. Since alleles for the  
417 *MAT1-1* and *MAT1-2* mating types are highly divergent, *MAT1-2* reads did not map to the *MAT1* locus of the  
418 reference genome. For this reason, isolates with a mapping gap on the *MAT1* locus were candidates for *MAT1-2*  
419 type. Confirmation of the mating type was done with a *de-novo* alignment of the unmapped reads with MegaHit (63)  
420 and posterior blasting with BLAST (64, 65) to a nucleotide database of *S. turcica* (which included the sequences of  
421 *MAT1-1* and *MAT1-2*). *MAT1-1* type was assigned to samples that had reads mapping to the *MAT1-1* sequence from  
422 Et28A reference genome and *MAT1-2* type was assigned to samples that had a mapping gap at the *MAT1-1* sequence  
423 and that the unmapped reads had a blast hit for the *MAT1-2* sequence.

424 **Population structure.** To asses population structure we conducted Principal Component Analysis (PCA), maximum  
425 likelihood estimation of individual ancestries with ADMIXTURE (66) and population network estimation with  
426 community detection using neighborhood selection implemented in CONE (27). PCA was calculated with the  
427 glPca function of the adegenet (67, 68) R package. To run ADMIXTURE we used a pruned SNP dataset (LD cutoff  
428  $r^2 > 0.2$  and minor allele frequency  $> 0.05$ ) and performed 20 independent ADMIXTURE runs with  $K$  from one  
429 to 15 and setting the -cv argument to compute cross validation errors. We used  $K = 5$  clusters to explain the  
430 data because higher values did not significantly reduce cross-validation error (Fig. S14) and produced always the  
431 same composition of clusters with  $K = 5$  in 20 independent runs. To merge the different admixture runs we used  
432 the CLUMPAK main pipeline (69) and kept the MajorGcluster output to plot the results. Population networks  
433 were estimated using R scripts for haploid data provided by CONE authors (27). The optimal value for the tuning

parameter was chosen with StARS using 40 subsamples of each of 1,777 SNPs, and 40 different values for the tuning parameter ranging from 0.5 to 0.005. Neighborhood selection was carried out with the whole dataset and selected tuning parameters. A population graph was constructed with the Fruchterman-Reingold algorithm and the Walktrap algorithm was used for community detection. An unrooted Neighbor-joining tree was built from Euclidean distances and Neighbor-net was calculated with SplitsTree v4.14.6 (70) using Hamming distances calculated from the unpolarized SNP dataset. A rooted Neighbor-joining tree was constructed with polarized SNP data that included the two reference genomes of US-American origin. A correlogram on Moran's  $I$  (71) was used to test the European spatial autocorrelation along different distance classes of equal frequency. As quantitative variable we used the individual's ancestry coefficient of each ADMIXTURE cluster with  $K = 5$ . To calculate the number of distance bins, Sturges method was used as implemented in the `correlog` function (used to calculate the correlogram) from the `pgirmess` R package (72, 73), which uses `moran.test` function from `spdep` R package (74).

**Diversity statistics.** Numbers of segregating sites  $S$ , genome-wide nucleotide diversity  $\pi$ , Watterson's estimator  $\theta_W$  and Tajima's  $D$  were calculated for the two sets of European and of Kenyan isolates, as well as for the subpopulations within them. The single isolate from Turkey within the Kenyan cluster (WGRS-Test\_23) has a strong effect on its diversity measures because it contributes 886 additional SNPs (7% of the total). Since this sample is geographically separated from Kenya, we excluded it from the subsequent analysis of the Kenyan cluster. Both  $\pi$  and  $\theta_W$  are reported per base pair by dividing genomewide values by the maximum number of bases aligned to the reference across all sampled isolates (which are 39,649,104 of 43,013,545). For the 15 biggest scaffolds, an additional sliding window analysis for windows of size 100k bp was performed. We computed  $\pi$ ,  $\theta_W$ , Tajima's  $D$  and the haplotype diversity per window for all groups with the R package `PopGenome` (75).

**MK test.** To calculate the McDonald-Kreitman (MK) test we first ran SnpEff version 4.3t (76) with the `-classic` output style and `Setosphaeria_turcica_et28a` genome version on vcf subsets that included i) only population polymorphisms and ii) only fixed derived mutations. We used reference Et28A as outcluster, and excluded positions where Et28A and the sample WGRS\_62 (closest sample to Et28A) were different. We counted the number of non-synonymous mutations as those classified as `NON_SYNONYMOUS`, `STOP_GAINED`, `START_LOST` or `STOP_LOST`, and the number of synonymous mutations as those classified as `SYNONYMOUS_CODING`, `SYNONYMOUS_START` or `SYNONYMOUS_STOP`. Thereafter Neutrality Index ( $NI$ ) was calculated as  $\frac{(P_n/P_s)}{(D_n/D_s)}$ , where  $P$  are polymorphisms,  $D$  substitutions,  $s$  synonymous mutations and  $n$  non-synonymous mutations. Fisher's exact test  $P$ -value was computed using the 2x2 contingency table of the four type of mutations.  $\pi_N/\pi_S$  ratio was calculated as  $(\sum_{i=1}^I \pi_{ni} N_i / \sum_{i=1}^I N_i) / (\sum_{i=1}^I \pi_{si} S_i / \sum_{i=1}^I S_i)$ , where  $I$  is the number of scaffolds,  $N_i$  is the number of non-synonymous sites in scaffold  $i$ ,  $S_i$  the number synonymous sites in scaffold  $i$  and  $\pi_{ni}$ ,  $\pi_{si}$  are the non-synonymous or synonymous nucleotide diversities per non-synonymous or synonymous site in scaffold  $i$ . All  $\pi_{ni}$ ,  $\pi_{si}$ ,  $N_i$  and  $S_i$  were obtained from `population_summary.txt` output file after running SnpGenie (77).

**Analysis of reproduction type.** The reproduction type (clonal vs. sexual) was analyzed with three approaches. First, we calculated the mating type ratio for each population. A 1:1 ratio of the mating type is a strong indicator for sexual reproduction whereas a significant skewed ratio indicates clonal reproduction (78, 79). Second, we tested

470 for recombination using the Phi test (80) as implemented in SplitsTree and third, we tested the null hypothesis of  
471 random association of alleles by 999 permutation tests of the standardized index of association ( $r\bar{d}$ ) with poppr (81).

472 **Demographic signals in clonal subpopulation.** For the five clusters Big Clonal, Small Clonal, French Clonal, Diverse  
473 and Kenyan, we performed model selection between sweepstake reproduction (genealogies modelled by Dirac- and  
474 Beta- $n$ -coalescents) or rapid selection (Bolthausen-Sznitman  $n$ -coalescent) in a fixed-size population and standard  
475 reproduction (Kingman's  $n$ -coalescent) in a fixed-size or an exponentially growing population. Additionally, we  
476 performed parameter estimation within the best-fitting model class. Model selection and parameter estimation  
477 is performed via random-forest based Approximate Bayesian Computation (82, 83) using quantiles of summary  
478 statistics for unpolarized data as described in (84). For the analysis, we treat each scaffold as a single non-recombining  
479 locus and run it on the 5 biggest scaffolds. We consider Beta( $2 - \alpha, \alpha$ )- $n$ -coalescents with  $\alpha \in [1, 2)$  ( $\alpha = 1$  denotes the  
480 Bolthausen-Sznitman  $n$ -coalescent), Dirac  $n$ -coalescents with parameter  $p \in (0, 1)$  and, for Kingman's  $n$ -coalescent,  
481 exponential growth rates in  $[0, 2500)$ . We set a uniform prior on  $p$  for Dirac- $n$ -coalescents, while for Beta- $n$ -coalescents,  
482 we set  $\alpha = 1$  with a probability of 5% and in all other case draw  $\alpha$  uniformly from  $(1, 2)$ . For Kingman's  $n$ -coalescent  
483 with exponential growth, the prior distribution on the parameters chooses growth rate  $g = 0$  with probability 0.02,  
484 and with probability 0.98 an auxiliary parameter  $g'$  is chosen uniformly from  $(\log(0.5), \log(2500))$  which is then  
485 transformed to  $g = \exp(g')$ . In other words, we use a uniform prior on the log scale on  $(0, 2500)$  with an additional  
486 spike at  $g = 0$ .

487 The scaled mutation rate  $\theta$  is set to the generalized Watterson estimator  $\theta_W = 2S/E(L_n)$ , where  $L_n$  is the expected  
488 total length of the underlying genealogy model, but with a random fluctuation around this estimate, as in Scenario 3  
489 in (84) (binomial prior with 11 steps in  $[\theta_W/5, 5\theta_W]$  with log-equidistant). As statistics, we use the (.1, .3, .5, .7, .9)-  
490 quantiles of the branch length of the neighbor-joining tree reconstructed from the genetic data, of the Hamming  
491 distances and of the linkage disequilibrium statistic  $r^2$ , as well as the number of segregating sites  $S$ , nucleotide  
492 diversity  $\pi$  and the folded site frequency spectrum, where all minor allele counts above 15 are summed up as a single  
493 statistic. We do not correct for unequal isolation times. While the effect of serial sampling may affect distinguishing  
494 multiplier merger coalescents from Kingman's coalescent with exponential growth (85), its effect is neglectable if the  
495 model selection points to Kingman's coalescent with exponential growth. Each model class is simulated 175,000  
496 times and the random forest is built from 500 trees. All simulations are performed as described in (84), the ABC  
497 parameter estimation and model selection are performed using the R package abcrf. An estimated lower bound for  
498 odds ratio/Bayes factors of the best fitting model to any other model (equivalent here due to a flat prior on the three  
499 model classes) is given by  $BF = \frac{P(\text{model}|Data)}{1 - P(\text{model}|Data)}$ , i.e. we treat the posterior probability of any one other model as the  
500 posterior probability that the best fitting model is not the true model.

501 **Phylogenetic dating with BEAST.** We ran BEAST2 (86) on the non-polarized variants for all European isolates but  
502 WGRS\_5, three Kenyan isolates (WGRS\_26, WGRS\_29 and WGRS-Test\_23) and the American reference genome  
503 (setup 'full') and separately for the clonal Big Clonal (excluding WGRS\_5), Small Clonal and French Clonal clusters,  
504 and the American reference genome (setup 'clonal'). Sample WGRS\_5 was excluded because according to given  
505 information it is a sample from Kenya, but according to population structure analyses that seem not possible as it is

506 clearly a clonal isolate from Big Clonal cluster. Therefore, because of the uncertainty of the origin of this sample, we  
507 decided to exclude it from any analysis using any geographic information.

508 The Kenyan and Diverse clusters were excluded from the second analysis to omit most recombination signals that  
509 were not incorporated in the BEAST approach, following (13). However, we added the reference, because the clonal  
510 lineages covered only a narrow window of sampling time differences (in time and mutations) between individuals  
511 and showed more noisy posterior estimates for split times, see *SI Appendix* Table S4 and Text E for more details.  
512 Each isolate was timed relative to its time of isolation. As site model, we used a  $\Gamma$  model with four categories and  
513 estimated the proportion of invariant site, starting with a proportion of 0.8. We used the HKY model for mutation,  
514 estimating the frequencies and assumed used a strict molecular clock. Test runs with a relaxed exponential molecular  
515 clock with two discrete rates and with the different mutation model GTR showed only very small changes, which  
516 indicated that potentially shorter generation times of *S. turcica* in warmer climates need not to be accounted for. Since  
517 only in-species samples are included, we the tree modeled with a coalescent, i.e the Coalescent Extended Bayesian  
518 Skyline. As starting tree, we used the cluster tree estimated via NJ2. All other model settings were kept at the default  
519 values. The MCMC parameters were 225 million cycles (every 100th trace and 1,000th tree stored) with a 10 million  
520 pre-burnin period (300 million for running on only clonal lineages and reference). For tree annotation, we used a 10  
521 % burn-in. After several pilot runs to adjust parameters, we conducted analyses with the above parameters. Effective  
522 Sample Size (ESS) scores that describes the correspondence the posterior distribution approximated by BEAST to the  
523 number of independent posterior, >100 for all non-population size parameters for the 'full' setup and >200 for the  
524 'clonal' setup. Several population size parameter scored between 45 and 100 for the 'full' setup and for the 'clonal  
525 setup' all but three sizes were >200 with a minimum ESS of 172.

526 **Variation in sequence coverage.** To use variation in sequence coverage as phylogenetic signal, we calculated  
527 variation of coverage in 1kb windows in each isolate. The most variable 2.5% windows were used to calculate a  
528 pairwise distance matrix of variance in coverage between all samples, from which a Neighbor-Joining tree was  
529 constructed.

530 **Reference-free association mapping.** To characterize sequence reads that did not map to the reference, we conducted  
531 reference-free association study based on *k*-mers using the HAWK (Hitting Associations With *K*-mers) pipeline (39).  
532 It identifies *k*-mers with significantly different frequencies between two clusters, and then assembles significant  
533 *k*-mers into longer sequences. We ran HAWK between pairs of different clusters identified by admixture, and  
534 between pairs of races independent of their assignment to populations: race 1 vs. race 0, race 0 vs. all, race 1 vs. all,  
535 race 3 vs. all, race 3N vs. race 0, race 3N vs. all, race 3 vs. race 1 and 0, race 3N vs. race 1 and 0, race 3 and 3N vs  
536 race 0 and 1. Race 1 vs. race 0 was also analysed for samples from the Big Clonal cluster only. Races included in the  
537 analysis were race 0, 1, 3 and 3N. Numbers of other races were too low for meaningful comparisons. Significantly  
538 differentiated *k*-mers were mapped against the reference genome to test for their presence in the reference genome  
539 and to characterize the extent of clustering in some regions. Repetitive elements in windows with high number of  
540 *k*-mers mapped were searched with the protein-based RepeatMasking (87). Gene-rich or gene-poor regions were  
541 determined for windows with high numbers of mapped *k*-mers by counting genes in these regions. Remaining

542 unmapped assembled *k*-mers were compared against the NCBI non-redundant protein database using BLASTX to  
543 identify putative protein sequences.

544 **Data Availability.** Raw sequence data of the 121 isolates generated in this study is available in the European Nucleotide  
545 Archive (ENA) under the project ID PRJEB37432. Scripts for analysing the data can be downloaded at DOI:  
546 10.5281/zenodo.4036236. Geographic and phenotypic information of the isolates is in the *SI Appendix* (Dataset S1).

547 **ACKNOWLEDGMENTS.** We thank Elisabeth Kokai-Kota for cultivating pathogen isolates, DNA extraction and sequencing  
548 preparation. We are grateful to Ana Galiano and Thomas Miedaner for comments on the manuscript. This work was funded by  
549 Deutsche Forschungsgemeinschaft (DFG) Priority program SPP1819 Rapid Evolutionary Adaptation - Potential and Constraints  
550 (Grant SCHM1354/11-1) to K. J. S. and SPP1590 Probabilistic Structures in Evolution (Grant FR3633/2-1) to F. F. The authors  
551 acknowledge the additional support by the state of Baden-Württemberg through bwHPC.

## 552 Bibliography

- 553 1. Papaix J, Rimbaud L, Burdon JJ, Zhan J, Thrall PH (2017) Differential impact of landscape-scale strategies for crop cultivar  
554 deployment on disease dynamics, resistance durability and long-term evolutionary control. *Evolutionary Applications* 11(5):705–717.
- 555 2. Bebber DP, Ramotowski MAT, Gurr SJ (2013) Crop pests and pathogens move polewards in a warming world. *Nature Climate  
556 Change*.
- 557 3. McDonald BA, Stukenbrock EH (2016) Rapid emergence of pathogens in agro-ecosystems: global threats to agricultural sustain-  
558 ability and food security. *Philosophical Transactions of the Royal Society B: Biological Sciences* 371(1709):20160026.
- 559 4. Islam MT, et al. (2016) Emergence of wheat blast in Bangladesh was caused by a South American lineage of *Magnaporthe oryzae*.  
560 *BMC Biology* 14(1).
- 561 5. Hubbard A, et al. (2015) Field pathogenomics reveals the emergence of a diverse wheat yellow rust population. *Genome Biology  
562* 16(1).
- 563 6. Lamour KH, et al. (2012) Genome Sequencing and Mapping Reveal Loss of Heterozygosity as a Mechanism for Rapid Adaptation  
564 in the Vegetable Pathogen *Phytophthora capsici*. *Molecular Plant-Microbe Interactions* 25(10):1350–1360. 00000.
- 565 7. Raffaele S, et al. (2010) Genome Evolution Following Host Jumps in the Irish Potato Famine Pathogen Lineage. *Science  
566* 330(6010):1540–1543.
- 567 8. Dong S, Raffaele S, Kamoun S (2015) The two-speed genomes of filamentous pathogens: waltz with plants. *Current Opinion in  
568 Genetics & Development* 35:57–65. 00043.
- 569 9. Thordal-Christensen H, Birch PRJ, Spanu PD, Panstruga R (2018) Why did filamentous plant pathogens evolve the potential to  
570 secrete hundreds of effectors to enable disease?: Why so many effectors? *Molecular Plant Pathology* 19(4):781–785.
- 571 10. Frantzeskakis L, Kusch S, Panstruga R (2019) The need for speed: compartmentalized genome evolution in filamentous phy-  
572 topathogens. *Molecular Plant Pathology* 20(1):3–7.
- 573 11. Gladioux P, et al. (2018) Coexistence of Multiple Endemic and Pandemic Lineages of the Rice Blast Pathogen. *mBio* 9(2):e01806–17.
- 574 12. Stam R, Sghyer H, Tellier A, Hess M, Huckelhoven R (2019) The current epidemic of the barley pathogen *Ramularia collo-cygni*  
575 derives from a recent population expansion and shows global admixture. *Phytopathology* pp. PHYTO–04–19–0117–R.
- 576 13. Latorre SM, et al. (2020) Recently expanded clonal lineages of the rice blast fungus display distinct patterns of presence/absence  
577 of effector genes. *bioRxiv*.
- 578 14. Yoshida K, et al. (2013) The rise and fall of the *Phytophthora infestans* lineage that triggered the Irish potato famine. *Elife* 2:e00731.
- 579 15. McDonald BA, Linde C (2002) Pathogen Population Genetics, Evolutionary Potential, and Durable Resistance. *Annual Review of  
580 Phytopathology* 40(1):349–379.
- 581 16. Burdon JJ, Barrett LG, Rebetzke G, Thrall PH (2014) Guiding deployment of resistance in cereals using evolutionary principles.  
582 *Evolutionary Applications* 7(6):609–624.



- 583 17. Galiano-Carneiro AL, Miedaner T (2017) Genetics of Resistance and Pathogenicity in the Maize/*Setosphaeria turcica* Pathosystem  
584 and Implications for Breeding. *Frontiers in Plant Science* 8.
- 585 18. Poland JA, Bradbury PJ, Buckler ES, Nelson RJ (2011) Genome-wide nested association mapping of quantitative resistance to  
586 northern leaf blight in maize. *Proceedings of the National Academy of Sciences* 108(17):6893–6898.
- 587 19. Sartoria M, Nescia A, Formento Á, Etcheverry M (2015) Selección de microorganismos epifíticos de maíz como potenciales agentes  
588 debiocontrolde *Exserohilum turcicum*. *Revista Argentina de Microbiología* 47(1):62–71.
- 589 20. Sartori M, et al. (2017) Efficacy of epiphytic bacteria to prevent northern leaf blight caused by *Exserohilum turcicum* in maize.  
590 *Revista Argentina de Microbiología* 49(1):75–82.
- 591 21. Borchardt DS, Welz HG, Geiger HH (1998) Genetic Structure of *Setosphaeria turcica* Populations in Tropical and Temperate  
592 Climates. *Phytopathology* 88(4):322–329.
- 593 22. Welz HG, Geiger HH (2000) Genes for resistance to northern corn leaf blight in diverse maize populations. *Plant Breeding*  
594 119(1):1–14.
- 595 23. Hanekamp, Hendrik (2016) Ph.D. Thesis (University of Göttingen, Göttingen).
- 596 24. Josse J, Husson F (2016) missMDA : A Package for Handling Missing Values in Multivariate Data Analysis. *Journal of Statistical*  
597 *Software* 70(1).
- 598 25. Ohm RA, et al. (2012) Diverse lifestyles and strategies of plant pathogenesis encoded in the genomes of eighteen dothideomycetes  
599 fungi. *PLOS Pathogens* 8(12):1–26.
- 600 26. Condon BJ, et al. (2013) Comparative genome structure, secondary metabolite, and effector coding capacity across *cochliobolus*  
601 pathogens. *PLOS Genetics* 9(1):1–29.
- 602 27. Kuismin MO, Ahlinder J, Sillanpää MJ (2017) CONE: Community Oriented Network Estimation Is a Versatile Framework for Inferring  
603 Population Structure in Large-Scale Sequencing Data. *G3: Genes, Genomes, Genetics* 7(10):3359–3377.
- 604 28. Nelson MA (1996) Mating systems in ascomycetes: a romp in the sac. *Trends in Genetics* 12(2):69 – 74.
- 605 29. Turgeon BG (1998) Application of mating type gene technology to problems in fungal biology. *Annual Review of Phytopathology*  
606 36(1):115–137. PMID: 15012495.
- 607 30. Kryazhimskiy S, Plotkin JB (2008) The population genetics of dn/ds. *PLoS genetics* 4(12):e1000304.
- 608 31. Akashi H, Osada N, Ohta T (2012) Weak selection and protein evolution. *Genetics* 192(1):15–31.
- 609 32. Ohta T (1973) Slightly deleterious mutant substitutions in evolution. *Nature* 246(5428):96–98.
- 610 33. Mideros SX, et al. (2018) Determinants of Virulence and In Vitro Development Colocalize on a Genetic Map of *Setosphaeria turcica*.  
611 *Phytopathology* 108(2):254–263.
- 612 34. Neher RA, Hallatschek O (2013) Genealogies of rapidly adapting populations. *Proceedings of the National Academy of Sciences*  
613 *USA* 110(2):437–442.
- 614 35. Steinrücken M, Birkner M, Blath J (2013) Analysis of dna sequence variation within marine species using beta-coalescents.  
615 *Theoretical Population Piology* 87:15–24.
- 616 36. Dutta A, Croll D, McDonald BA, Barrett LG (2020) Maintenance of variation in virulence and reproduction in populations of an  
617 agricultural plant pathogen. *Evolutionary Applications* n/a(n/a).
- 618 37. Tellier A, Lemaire C (2014) Coalescence 2.0: a multiple branching of recent theoretical developments and their applications.  
619 *Molecular ecology* 23(11):2637–2652.
- 620 38. Kass RE, Raftery AE (1995) Bayes factors. *Journal of the american statistical association* 90(430):773–795.
- 621 39. Rahman A, Hallgrímsdóttir I, Eisen M, Pachter L (2018) Association mapping from sequencing reads using k-mers. *eLife* 7:e32920.
- 622 40. Borchardt DS, Welz HG, Geiger HH (1998) Molecular marker analysis of European *Setosphaeria turcica* populations. *European*  
623 *Journal of Plant Pathology* 104(6):611–617.
- 624 41. Saunders IW, Tavaré S, Watterson G (1984) On the genealogy of nested subsamples from a haploid population. *Advances in*  
625 *Applied probability* 16(3):471–491.
- 626 42. Croll D, McDonald BA (2017) The genetic basis of local adaptation for pathogenic fungi in agricultural ecosystems. *Molecular*  
627 *Ecology* 26(7):2027–2040.



- 628 43. Freund F, Siri-Jégousse A (2020) The impact of genetic diversity statistics on model selection between coalescents. *Computational*  
629 *Statistics & Data Analysis* p. 107055.
- 630 44. Koskela J, Wilke Berenguer M (2019) Robust model selection between population growth and multiple merger coalescents.  
631 *Mathematical Biosciences* 311:1–12.
- 632 45. Wang M, et al. (2018) Two-way mixed-effects methods for joint association analysis using both host and pathogen genomes.  
633 *Proceedings of the National Academy of Sciences* 115(24):E5440–E5449.
- 634 46. Nelson R, Wiesner-Hanks T, Wissner R, Balint-Kurti P (2018) Navigating complexity to breed disease-resistant crops. *Nature*  
635 *Reviews Genetics* 19(1):21–33.
- 636 47. Baym M, et al. (2015) Inexpensive Multiplexed Library Preparation for Megabase-Sized Genomes. *PLOS ONE* 10(5):e0128036.
- 637 48. Bolger AM, Lohse M, Usadel B (2014) Trimmomatic: a flexible trimmer for illumina sequence data. *Bioinformatics* 30(15):2114–2120.
- 638 49. Li H, Durbin R (2009) Fast and accurate short read alignment with burrows–wheeler transform. *Bioinformatics* 25(14):1754–1760.
- 639 50. Kersey PJ, et al. (2016) Ensembl genomes 2016: more genomes, more complexity. *Nucleic Acids Research* 44(D1):D574–D580.
- 640 51. McKenna A, et al. (2010) The genome analysis toolkit: A mapreduce framework for analyzing next-generation dna sequencing data.  
641 *Genome Research* 20(9):1297–1303.
- 642 52. Okonechnikov K, Conesa A, García-Alcalde F (2016) Qualimap 2: advanced multi-sample quality control for high-throughput  
643 sequencing data. *Bioinformatics* 32(2):292–294.
- 644 53. Li H, et al. (2009) The sequence alignment/map format and samtools. *Bioinformatics* 25(16):2078–2079.
- 645 54. Li H (2011) A statistical framework for snp calling, mutation discovery, association mapping and population genetical parameter  
646 estimation from sequencing data. *Bioinformatics* 27(21):2987–2993.
- 647 55. Narasimhan V, et al. (2016) Bcftools/roh: a hidden markov model approach for detecting autozygosity from next-generation  
648 sequencing data. *Bioinformatics* 32(11):1749–1751.
- 649 56. Danecek P, et al. (2011) The variant call format and vcftools. *Bioinformatics* 27(15):2156–2158.
- 650 57. Josse J, Husson F (2016) missmda: A package for handling missing values in multivariate data analysis. *Journal of Statistical*  
651 *Software, Articles* 70(1):1–31.
- 652 58. Blanchette M, et al. (2004) Aligning multiple genomic sequences with the threaded blockset aligner. *Genome Research* 14(4):708–  
653 715.
- 654 59. Duthiel JY, Gaillard S, Stukenbrock EH (2014) Maffilter: a highly flexible and extensible multiple genome alignment files processor.  
655 *BMC Genomics* 15(1):53.
- 656 60. Grigoriev IV, et al. (2012) The genome portal of the department of energy joint genome institute. *Nucleic Acids Research*  
657 40(D1):D26–D32.
- 658 61. Nordberg H, et al. (2014) The genome portal of the department of energy joint genome institute: 2014 updates. *Nucleic Acids*  
659 *Research* 42(D1):D26–D31.
- 660 62. Chung CL, Jamann T, Longfellow J, Nelson R (2010) Characterization and fine-mapping of a resistance locus for northern leaf  
661 blight in maize bin 8.06. *Theoretical and Applied Genetics* 121(2):205–227.
- 662 63. Li D, Liu CM, Luo R, Sadakane K, Lam TW (2015) Megahit: an ultra-fast single-node solution for large and complex metagenomics  
663 assembly via succinct de bruijn graph. *Bioinformatics* 31(10):1674–1676.
- 664 64. Altschul SF, Gish W, Miller W, Myers EW, Lipman DJ (1990) Basic local alignment search tool. *Journal of Molecular Biology*  
665 215(3):403–410.
- 666 65. Camacho C, et al. (2009) BLAST+: architecture and applications. *BMC Bioinformatics* 10(1):421.
- 667 66. Alexander DH, Novembre J, Lange K (2009) Fast model-based estimation of ancestry in unrelated individuals. *Genome Research*  
668 19(9):1655–1664.
- 669 67. Jombart T (2008) adegenet: a r package for the multivariate analysis of genetic markers. *Bioinformatics* 24:1403–1405.
- 670 68. Jombart T, Ahmed I (2011) adegenet 1.3-1: new tools for the analysis of genome-wide snp data. *Bioinformatics*.
- 671 69. Kopelman NM, Mayzel J, Jakobsson M, Rosenberg NA, Mayrose I (2015) Clumpak: a program for identifying clustering modes and  
672 packaging population structure inferences across K. *Molecular Ecology Resources* 15(5):1179–1191.

- 673 70. Huson DH, Bryant D (2006) Application of phylogenetic networks in evolutionary studies. *Molecular Biology and Evolution*  
674 23(2):254–267.
- 675 71. Cliff AD, Ord JK, Cliff AD (1981) *Spatial processes: models & applications*. (Pion London), p. 266 p. .:
- 676 72. Bivand R, Wong DWS (2018) Comparing implementations of global and local indicators of spatial association. *TEST* 27(3):716–748.
- 677 73. Bivand RS, Pebesma E, Gomez-Rubio V (2013) *Applied spatial data analysis with R, Second edition*. (Springer, NY).
- 678 74. Giraudoux P (2018) *pgirmess: Spatial Analysis and Data Mining for Field Ecologists*. R package version 1.6.9.
- 679 75. Pfeifer B, Wittelsbürger U, Ramos-Onsins SE, Lercher MJ (2014) Popgenome: an efficient swiss army knife for population genomic  
680 analyses in r. *Molecular biology and evolution* 31(7):1929–1936.
- 681 76. Cingolani P, et al. (2012) A program for annotating and predicting the effects of single nucleotide polymorphisms, snpeff. *Fly*  
682 6(2):80–92.
- 683 77. Nelson CW, Moncla LH, Hughes AL (2015) SNPGenie: estimating evolutionary parameters to detect natural selection using pooled  
684 next-generation sequencing data. *Bioinformatics* 31(22):3709–3711.
- 685 78. Sommerhalder RJ, McDonald BA, Zhan J (2006) The Frequencies and Spatial Distribution of Mating Types in *Stagonospora*  
686 *nodorum* are Consistent with Recurring Sexual Reproduction. *Phytopathology* 96(3):234–239.
- 687 79. Milgroom MG (1996) Recombination and the Multilocus Structure of Fungal Populations. *Annual Review of Phytopathology*  
688 34(1):457–477.
- 689 80. Bruen TC, Philippe H, Bryant D (2006) A simple and robust statistical test for detecting the presence of recombination. *Genetics*  
690 172(4):2665–2681.
- 691 81. Kamvar ZN, Tabima JF, Grünwald NJ (2014) Poppr: an r package for genetic analysis of populations with clonal, partially clonal,  
692 and/or sexual reproduction. *PeerJ* 2:e281.
- 693 82. Pudlo P, et al. (2015) Reliable abc model choice via random forests. *Bioinformatics* 32(6):859–866.
- 694 83. Raynal L, et al. (2019) Abc random forests for bayesian parameter inference. *Bioinformatics* 35(10):1720–1728.
- 695 84. Freund F, Siri-Jégousse A (2020) The impact of genetic diversity statistics on model selection between coalescents. *Computational*  
696 *Statistics & Data Analysis* p. 107055.
- 697 85. Menardo F, Gagneux S, Freund F (2020) Multiple merger genealogies in outbreaks of *Mycobacterium tuberculosis*. *Molecular*  
698 *Biology and Evolution*. msaa179.
- 699 86. Bouckaert R, et al. (2014) Beast 2: a software platform for bayesian evolutionary analysis. *PLoS computational biology*  
700 10(4):e1003537.
- 701 87. A.F.A. Smit RHPG (2013-2015) Repeatmasker open-4.0.
